# Supplementary material for: Application of surface selective site-directed crystallization in a visual assay of DNA
Source: Royal Society of Chemistry journal article supplement (doi:10.1039/d4sd00149d), 2024-01-01
Supplement: d4sd00149d1.pdf [file d4sd00149d1.pdf]

## Supporting Information

### Application of Surface Selective site-directed crystallization in visual assay of

#### DNA

Jin R. Chen<sup>a,b</sup>, Ru W. Xie<sup>a</sup>, Rui Liu<sup>b</sup>, Li S. Liu<sup>a\*</sup>, Shu S. Zhang<sup>a\*</sup>

a. Shandong Province Key Laboratory of Detection Technology of Tumor Markers, Linyi University, Linyi 276005, China.

b. Department of Biotechnology, College of Engineering, The University of Suwon, Hwaseong 18323, Korea.

**Table S1.** The DNA oligonucleotides used in SSSC DNA assay method.

| Oligonucleotides used | sequence                                |
|-----------------------|-----------------------------------------|
| Capture DNA (cDNA)    | 5' ATTTAACAATAATCCAAAAAAAAAAAA-SH 3'    |
| Target DNA (tDNA)     | 5' GGATTATTGTTAAATATTGATAAGGAT 3'       |
| Probe DNA (pDNA)      | 5' COOH-AAAAAAAAAAAAATCCTTATCAAT 3'     |
| FAM-probe DNA         | 5' FAM-AAAAAAAAAAAAATCCTTATCAAT 3'      |
| Random                | 5' GAGTAATTAGGTTAATAGAGTAGTTGG 3'       |
| HVB                   | 5' TTGGCTTTCAGTTATATGGATGATGTGGTA 3'    |
| HIV                   | 5' AGAAGATATTTGGAATAACATGACCTGGATGCA 3' |

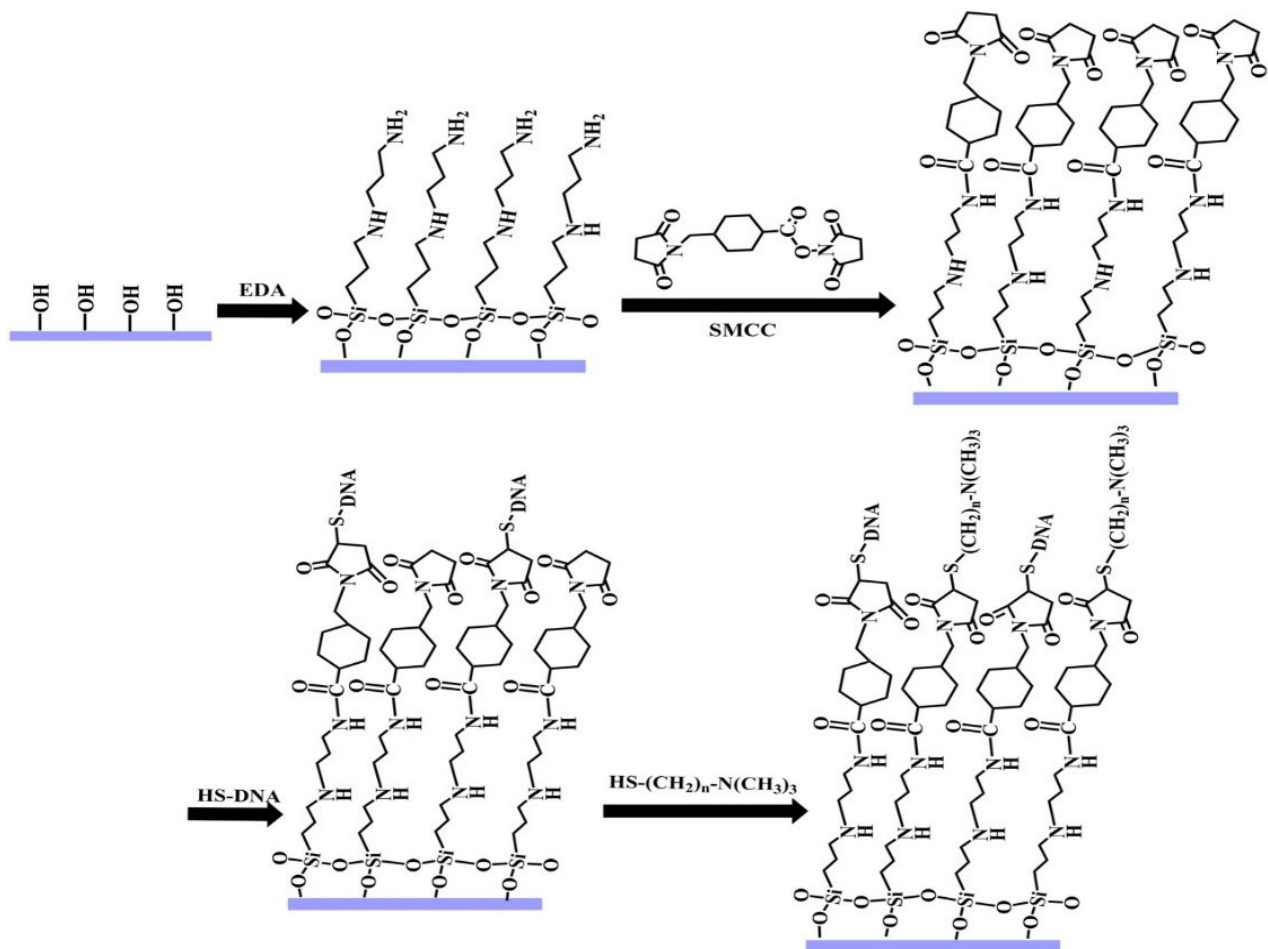

**Figure S1.** Modification process of glass slide.

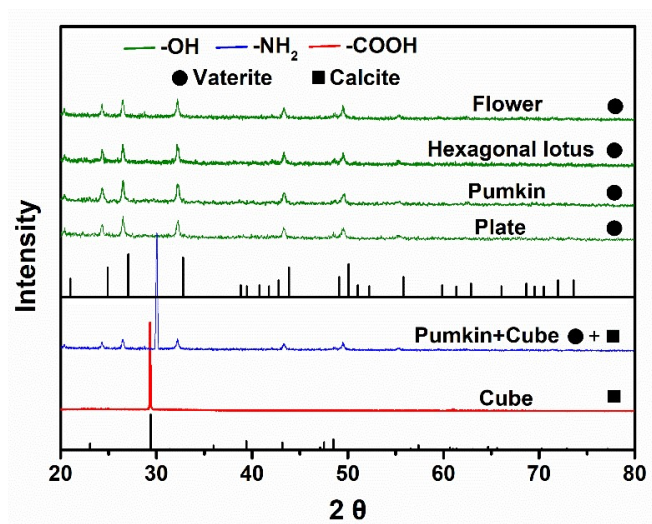

**Figure S2.** X-ray diffraction(XRD) pattern of  $\text{CaCO}_3$  crystals formed on functionalized slides.

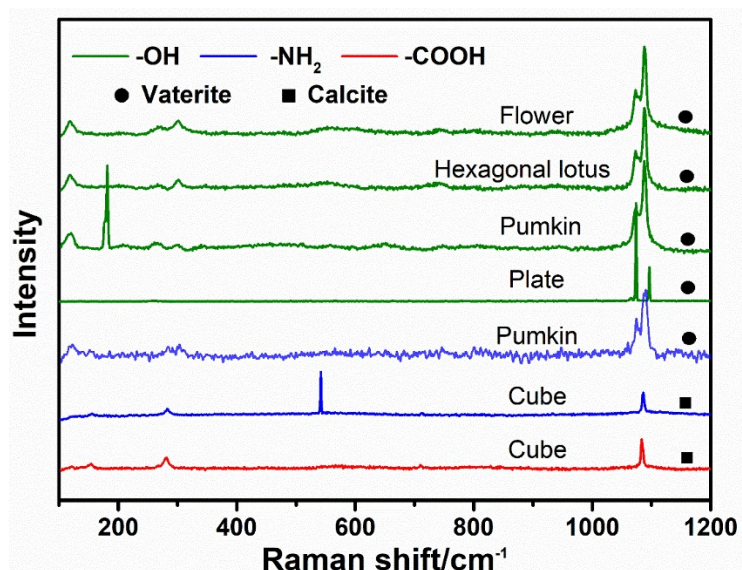

**Figure S3.** Raman spectroscopy of  $\text{CaCO}_3$  crystals formed on functional slides, that 1085, 281 and 153  $\text{cm}^{-1}$  are typical calcite peaks, and the double peaks of 1090 and 1075  $\text{cm}^{-1}$  indicate vaterite crystal.

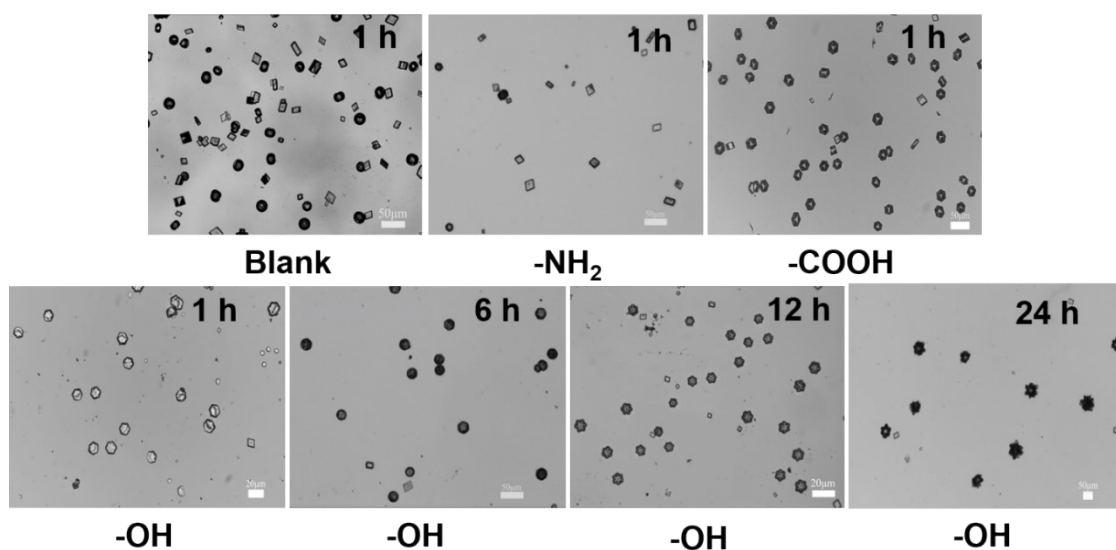

**Figure S4.** Optical microscopy images of functionalized slide surface after  $\text{CaCO}_3$  crystallization experiment.

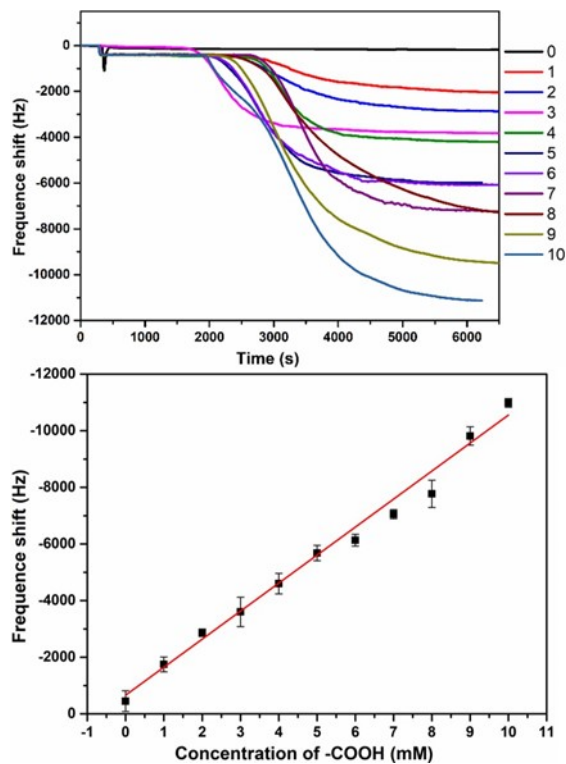

**Figure S5.** Crystal growth was detected by QCM: the concentration of the inhibitory group was fixed to 10nM.

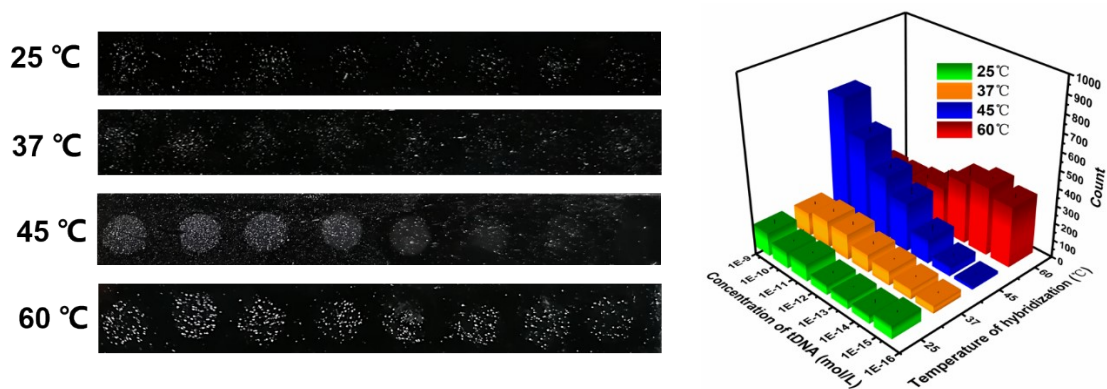

**Figure S6.** Optimization of DNA hybridization temperature used in SSSC DNA assay method, the concentration of tDNA: 1 nM, 100 pM, 10 pM, 1 pM, 100 fM, 10 fM, 1 fM, 0 M. (The concentration of  $\text{Ca}^{2+}$ : 3 mM; crystallization time: 1 h).

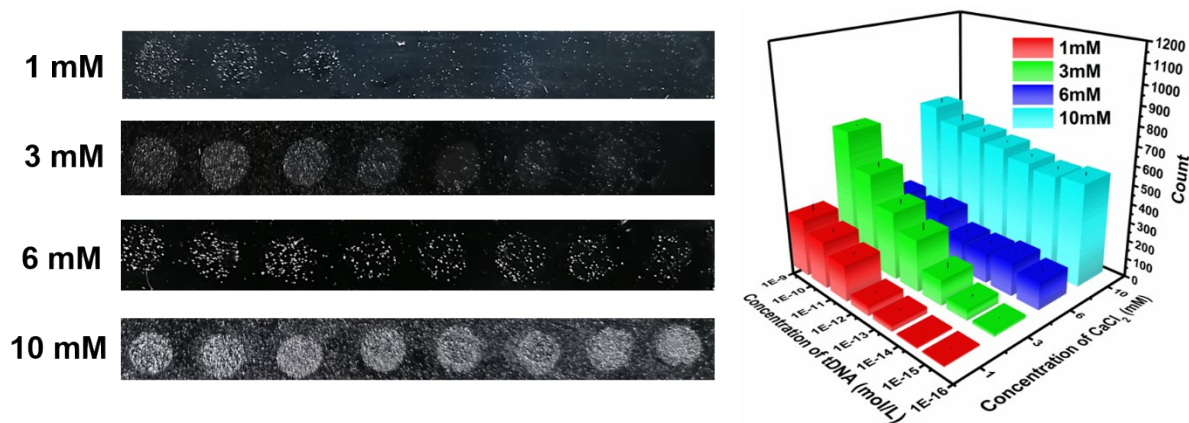

**Figure S7.** Optimization of  $\text{Ca}^{2+}$  concentration used in SSSC DNA assay method, the concentration of tDNA: 1 nM, 100 pM, 10 pM, 1 pM, 100 fM, 10 fM, 1 fM, 0 M. (DNA hybridization temperature: 45 °C; crystallization time: 1 h).

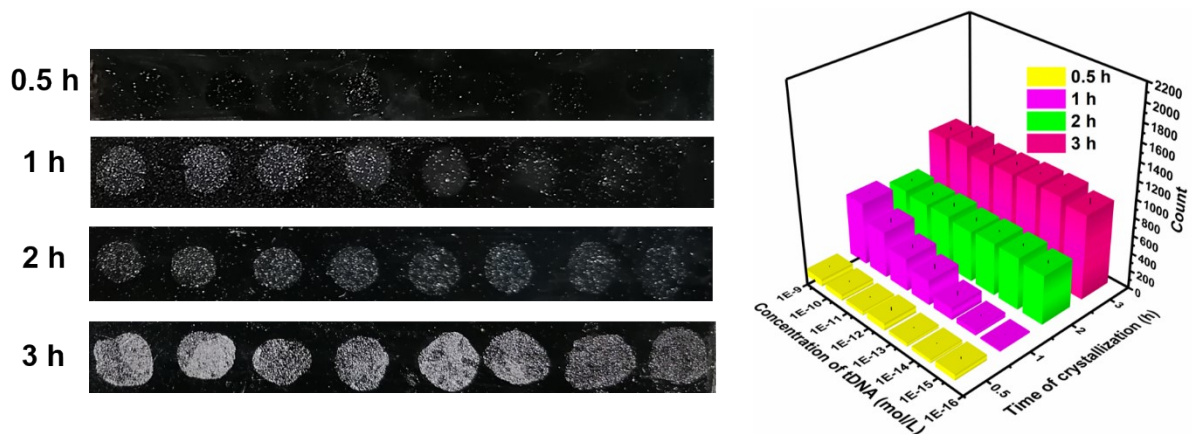

**Figure S8.** Optimization of the crystallization time used in SSSC DNA assay method, the concentration of tDNA: 1 nM, 100 pM, 10 pM, 1 pM, 100 fM, 10 fM, 1 fM, 0 M. ( $\text{Ca}^{2+}$  concentration: 3 mM; DNA hybridization temperature: 45 °C).

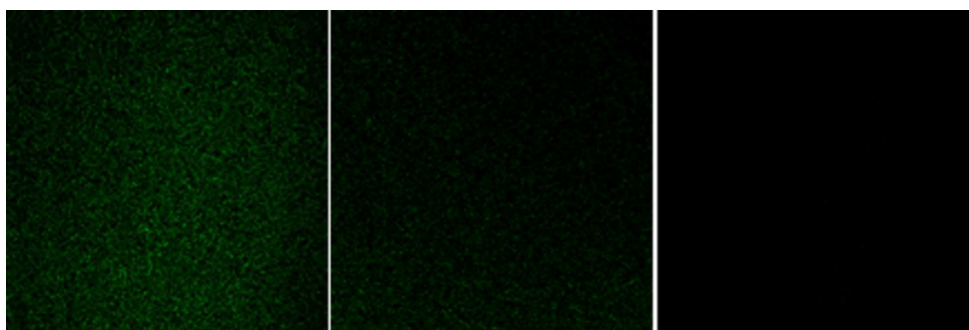

**Figure S9.** Confocal imaging of DNA hybridized with FAM-labeled probe DNA. (tDNA concentration: 1  $\mu\text{M}$ , 100 nM, 10 nM).

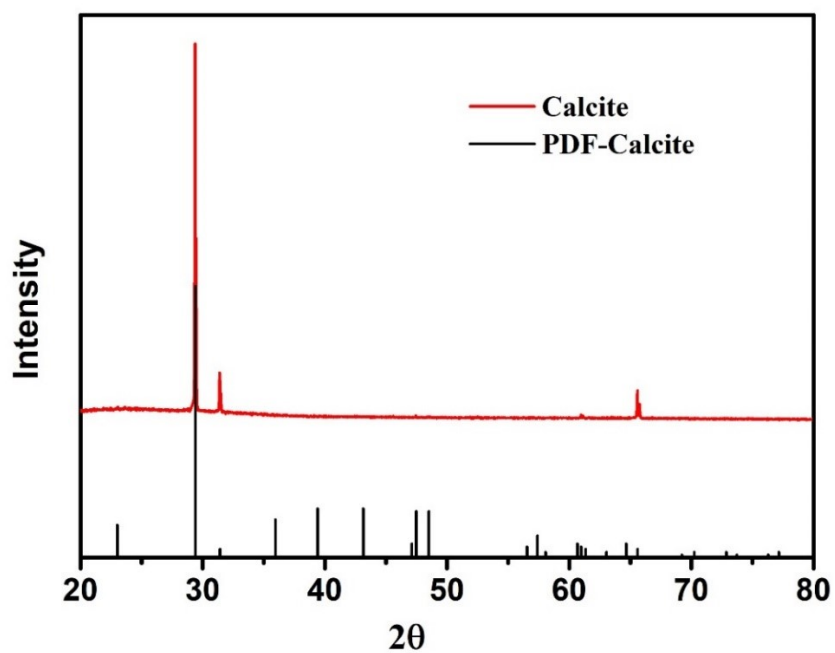

**Figure S10.** X-ray diffraction (XRD) pattern of CaCO<sub>3</sub> crystals formed on glass surface in SSSC DNA assay method.

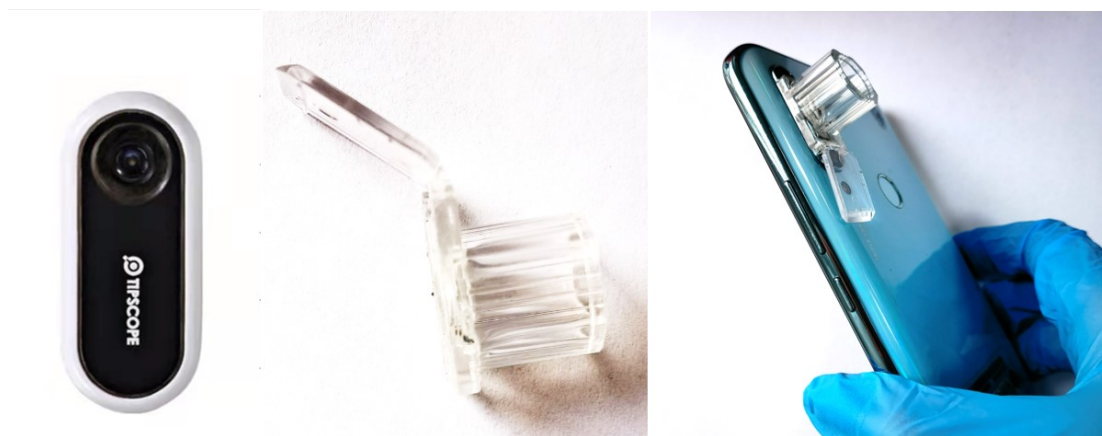

**Figure S11.** Picture of the 20× to 400× and 20× to 200× universal tip scope used in SSSC DNA assay method.

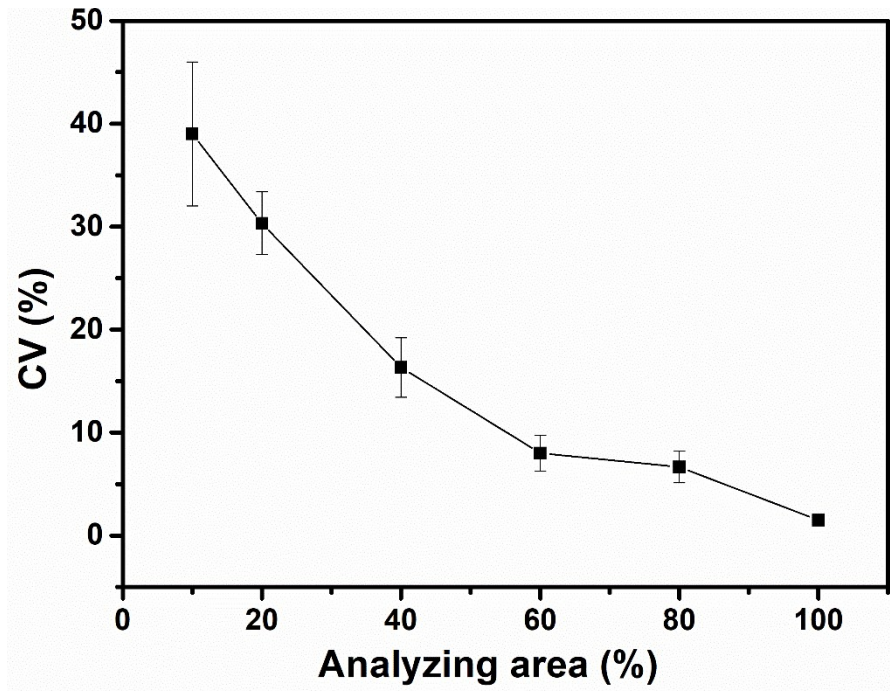

**Figure S12.** CVs of analyzing area. The result shows that the counting accuracy increases with the increment of analyzing area.

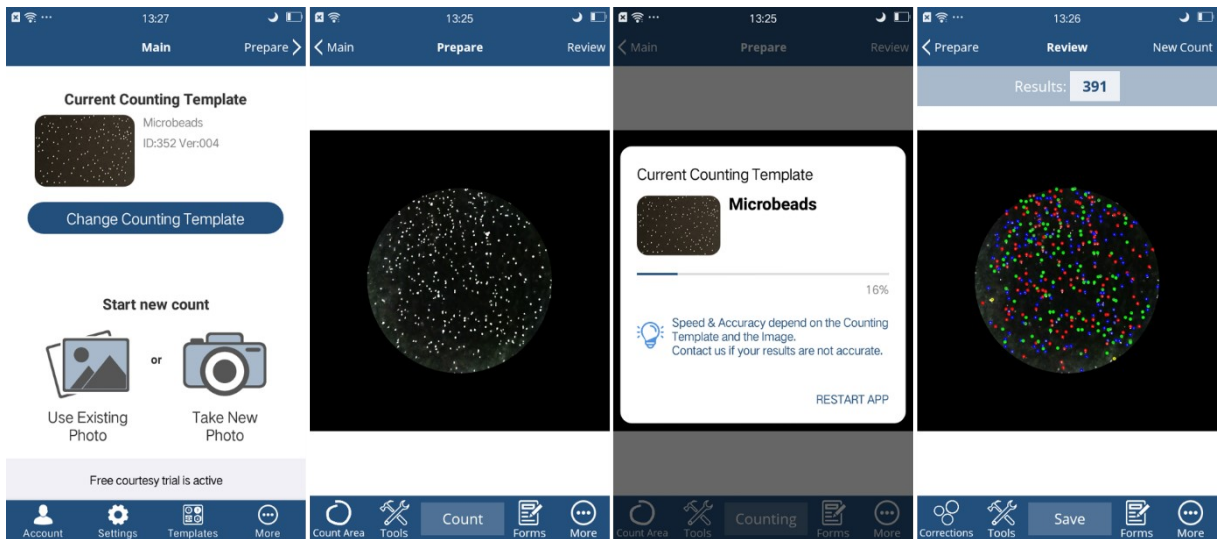

**Figure S13.** User interface of the mobile app “Count Things”.

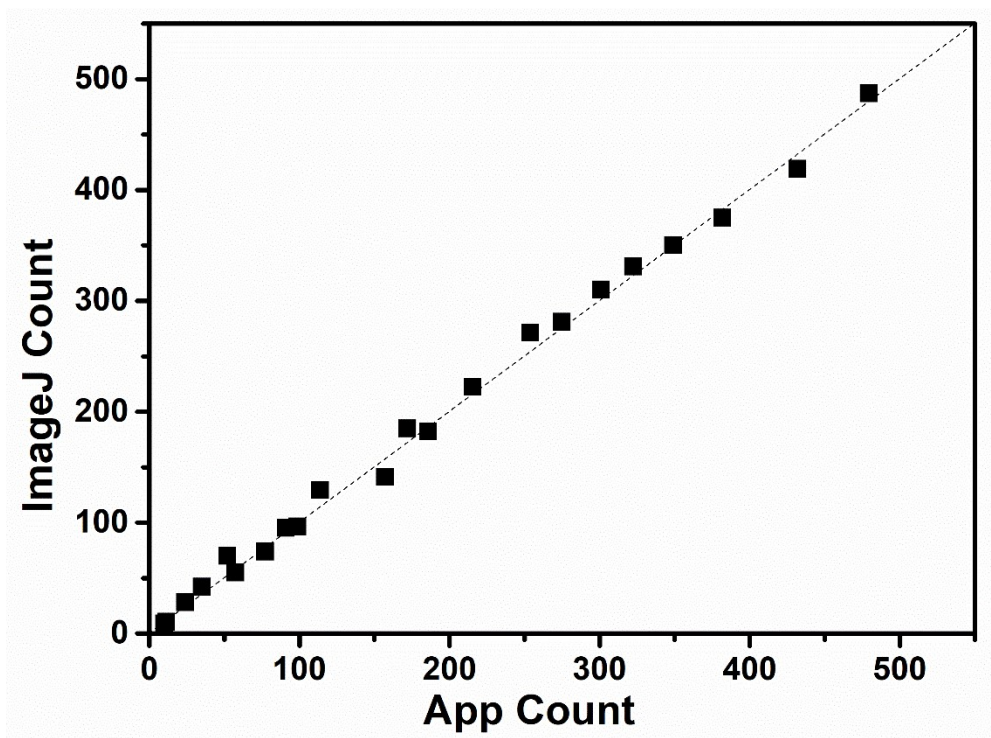

**Figure S14.** The comparison of two counting programs. The readouts by the app “Count Things” correlate well with that by Image J.

**Table. S2.** CVs of crystal counts in SSSC DNA assay method assay of DNA.

| <b>tDNA (mol/L)</b>          | <b>CV</b> |
|------------------------------|-----------|
| <b><math>10^{-15}</math></b> | 6%        |
| <b><math>10^{-14}</math></b> | 14%       |
| <b><math>10^{-13}</math></b> | 5%        |
| <b><math>10^{-12}</math></b> | 12%       |
| <b><math>10^{-11}</math></b> | 7%        |
| <b><math>10^{-10}</math></b> | 15%       |



|                        |            |
|------------------------|------------|
| <b>10<sup>-9</sup></b> | <b>16%</b> |
| <b>Average CV</b>      | <b>11%</b> |

**Video S1.** Growth of CaCO<sub>3</sub> crystals on a section of the glass surface recorded by conventional microscope (20× magnification, 1 frame per 30 s, Play at 20× speed).

The video file is provided separately in the attachment
